# Supplementary material
Source: publisher site journal article supplement (https://www.kjim.org/upload/media/kjim-2025-171-Supplementary-Table-12.pdf)
Supplement: Supplementary file 1 [file kjim-2025-171-Supplementary-Table-12.pdf]

**Supplementary Table 12. Stratification analysis of the incident risk of acute pancreatitis following zoster vaccination in the propensity score-matched cohort**

| Acute pancreatitis                   | Events, n (%) | Incidence rate <sup>b)</sup> | aHR (95% CI)                      |                                   |
|--------------------------------------|---------------|------------------------------|-----------------------------------|-----------------------------------|
|                                      |               |                              | Model 1 <sup>c)</sup>             | Model 2 <sup>d)</sup>             |
| Sex                                  |               |                              |                                   |                                   |
| Male                                 |               |                              |                                   |                                   |
| Unvaccinated                         | 2,009 (0.63)  | 0.49                         | 1.0 (reference)                   | 1.0 (reference)                   |
| Vaccinated                           | 1,504 (0.47)  | 0.41                         | 0.80 (0.74 to 0.85) <sup>e)</sup> | 0.79 (0.74 to 0.84) <sup>e)</sup> |
| Female                               |               |                              |                                   |                                   |
| Unvaccinated                         | 2,242 (0.54)  | 0.55                         | 1.0 (reference)                   | 1.0 (reference)                   |
| Vaccinated                           | 1,925 (0.47)  | 0.52                         | 0.90 (0.84 to 0.95) <sup>e)</sup> | 0.88 (0.83 to 0.94) <sup>e)</sup> |
| Age (yr)                             |               |                              |                                   |                                   |
| < 60                                 |               |                              |                                   |                                   |
| Unvaccinated                         | 1,680 (0.86)  | 0.41                         | 1.0 (reference)                   | 1.0 (reference)                   |
| Vaccinated                           | 1,258 (0.64)  | 0.34                         | 0.77 (0.71 to 0.82) <sup>e)</sup> | 0.74 (0.69 to 0.80) <sup>e)</sup> |
| ≥ 60                                 |               |                              |                                   |                                   |
| Unvaccinated                         | 2,571 (0.48)  | 0.63                         | 1.0 (reference)                   | 1.0 (reference)                   |
| Vaccinated                           | 2,171 (0.41)  | 0.59                         | 0.91 (0.86 to 0.96) <sup>e)</sup> | 0.90 (0.85 to 0.95) <sup>e)</sup> |
| Region of residence                  |               |                              |                                   |                                   |
| Urban                                |               |                              |                                   |                                   |
| Unvaccinated                         | 1,922 (0.57)  | 0.47                         | 1.0 (reference)                   | 1.0 (reference)                   |
| Vaccinated                           | 1,540 (0.45)  | 0.42                         | 0.84 (0.78 to 0.89) <sup>e)</sup> | 0.82 (0.77 to 0.88) <sup>e)</sup> |
| Rural                                |               |                              |                                   |                                   |
| Unvaccinated                         | 2,329 (0.59)  | 0.57                         | 1.0 (reference)                   | 1.0 (reference)                   |
| Vaccinated                           | 1,889 (0.48)  | 0.51                         | 0.86 (0.81 to 0.92) <sup>e)</sup> | 0.85 (0.80 to 0.91) <sup>e)</sup> |
| Household income                     |               |                              |                                   |                                   |
| Low (0th–39th percentile)            |               |                              |                                   |                                   |
| Unvaccinated                         | 1,293 (0.61)  | 0.31                         | 1.0 (reference)                   | 1.0 (reference)                   |
| Vaccinated                           | 949 (0.45)    | 0.26                         | 0.78 (0.72 to 0.85) <sup>e)</sup> | 0.77 (0.71 to 0.84) <sup>e)</sup> |
| Middle (40th–79th percentile)        |               |                              |                                   |                                   |
| Unvaccinated                         | 1,498 (0.57)  | 0.36                         | 1.0 (reference)                   | 1.0 (reference)                   |
| Vaccinated                           | 1,175 (0.45)  | 0.32                         | 0.84 (0.78 to 0.91) <sup>e)</sup> | 0.83 (0.77 to 0.90) <sup>e)</sup> |
| High (80th–100th percentile)         |               |                              |                                   |                                   |
| Unvaccinated                         | 1,460 (0.57)  | 0.36                         | 1.0 (reference)                   | 1.0 (reference)                   |
| Vaccinated                           | 1,305 (0.50)  | 0.35                         | 0.91 (0.85 to 0.99) <sup>e)</sup> | 0.90 (0.84 to 0.97) <sup>e)</sup> |
| Body mass index (kg/m <sup>2</sup> ) |               |                              |                                   |                                   |
| < 23.0                               |               |                              |                                   |                                   |
| Unvaccinated                         | 1,266 (0.66)  | 0.31                         | 1.0 (reference)                   | 1.0 (reference)                   |
| Vaccinated                           | 977 (0.51)    | 0.26                         | 0.81 (0.75 to 0.88) <sup>e)</sup> | 0.80 (0.74 to 0.87) <sup>e)</sup> |
| 23.0–24.9                            |               |                              |                                   |                                   |
| Unvaccinated                         | 1,186 (0.59)  | 0.29                         | 1.0 (reference)                   | 1.0 (reference)                   |
| Vaccinated                           | 949 (0.48)    | 0.26                         | 0.85 (0.78 to 0.93) <sup>e)</sup> | 0.84 (0.77 to 0.91) <sup>e)</sup> |
| ≥ 25.0                               |               |                              |                                   |                                   |
| Unvaccinated                         | 1,799 (0.53)  | 0.44                         | 1.0 (reference)                   | 1.0 (reference)                   |
| Vaccinated                           | 1,503 (0.44)  | 0.41                         | 0.88 (0.82 to 0.94) <sup>e)</sup> | 0.87 (0.81 to 0.93) <sup>e)</sup> |

Supplementary Table 12. Continued

| Acute pancreatitis                         | Events, n (%) | Incidence rate <sup>b)</sup> | aHR (95% CI)                      |                                   |
|--------------------------------------------|---------------|------------------------------|-----------------------------------|-----------------------------------|
|                                            |               |                              | Model 1 <sup>c)</sup>             | Model 2 <sup>d)</sup>             |
| Smoking status <sup>a)</sup>               |               |                              |                                   |                                   |
| Non-smoker                                 |               |                              |                                   |                                   |
| Unvaccinated                               | 2,745 (0.54)  | 0.67                         | 1.0 (reference)                   | 1.0 (reference)                   |
| Vaccinated                                 | 2,300 (0.46)  | 0.62                         | 0.88 (0.84 to 0.93) <sup>e)</sup> | 0.87 (0.83 to 0.92) <sup>e)</sup> |
| Smoker                                     |               |                              |                                   |                                   |
| Unvaccinated                               | 1,506 (0.67)  | 0.37                         | 1.0 (reference)                   | 1.0 (reference)                   |
| Vaccinated                                 | 1,129 (0.49)  | 0.30                         | 0.79 (0.73 to 0.85) <sup>e)</sup> | 0.77 (0.72 to 0.84) <sup>e)</sup> |
| Alcohol consumption (day per week)         |               |                              |                                   |                                   |
| < 1                                        |               |                              |                                   |                                   |
| Unvaccinated                               | 1,852 (0.46)  | 0.45                         | 1.0 (reference)                   | 1.0 (reference)                   |
| Vaccinated                                 | 1,308 (0.32)  | 0.35                         | 0.75 (0.70 to 0.80) <sup>e)</sup> | 0.75 (0.69 to 0.80) <sup>e)</sup> |
| 1–4                                        |               |                              |                                   |                                   |
| Unvaccinated                               | 2,294 (0.73)  | 0.56                         | 1.0 (reference)                   | 1.0 (reference)                   |
| Vaccinated                                 | 2,051 (0.65)  | 0.55                         | 0.93 (0.87 to 0.98) <sup>e)</sup> | 0.91 (0.86 to 0.97) <sup>e)</sup> |
| ≥ 5                                        |               |                              |                                   |                                   |
| Unvaccinated                               | 105 (0.87)    | 0.03                         | 1.0 (reference)                   | 1.0 (reference)                   |
| Vaccinated                                 | 70 (0.53)     | 0.02                         | 0.67 (0.49 to 0.90) <sup>e)</sup> | 0.66 (0.49 to 0.89) <sup>e)</sup> |
| Physical activity                          |               |                              |                                   |                                   |
| Insufficient physical activity             |               |                              |                                   |                                   |
| Unvaccinated                               | 3,270 (0.58)  | 0.80                         | 1.0 (reference)                   | 1.0 (reference)                   |
| Vaccinated                                 | 2,580 (0.46)  | 0.70                         | 0.84 (0.80 to 0.88) <sup>e)</sup> | 0.83 (0.79 to 0.87) <sup>e)</sup> |
| Sufficient physical activity               |               |                              |                                   |                                   |
| Unvaccinated                               | 981 (0.58)    | 0.24                         | 1.0 (reference)                   | 1.0 (reference)                   |
| Vaccinated                                 | 849 (0.48)    | 0.23                         | 0.88 (0.81 to 0.97) <sup>e)</sup> | 0.87 (0.79 to 0.95) <sup>e)</sup> |
| Medication use for coronary artery disease |               |                              |                                   |                                   |
| No                                         |               |                              |                                   |                                   |
| Unvaccinated                               | 4,065 (0.58)  | 0.99                         | 1.0 (reference)                   | 1.0 (reference)                   |
| Vaccinated                                 | 3,282 (0.47)  | 0.89                         | 0.85 (0.81 to 0.89) <sup>e)</sup> | 0.84 (0.80 to 0.88) <sup>e)</sup> |
| Yes                                        |               |                              |                                   |                                   |
| Unvaccinated                               | 186 (0.71)    | 0.05                         | 1.0 (reference)                   | 1.0 (reference)                   |
| Vaccinated                                 | 147 (0.57)    | 0.04                         | 0.84 (0.68 to 1.04)               | 0.83 (0.67 to 1.03)               |
| Medication use for hypertension            |               |                              |                                   |                                   |
| No                                         |               |                              |                                   |                                   |
| Unvaccinated                               | 2,869 (0.59)  | 0.70                         | 1.0 (reference)                   | 1.0 (reference)                   |
| Vaccinated                                 | 2,214 (0.46)  | 0.60                         | 0.84 (0.79 to 0.88) <sup>e)</sup> | 0.82 (0.78 to 0.87) <sup>e)</sup> |
| Yes                                        |               |                              |                                   |                                   |
| Unvaccinated                               | 1,382 (0.57)  | 0.34                         | 1.0 (reference)                   | 1.0 (reference)                   |
| Vaccinated                                 | 1,215 (0.48)  | 0.33                         | 0.87 (0.81 to 0.94) <sup>e)</sup> | 0.87 (0.80 to 0.94) <sup>e)</sup> |

Supplementary Table 12. Continued

| Acute pancreatitis                | Events, n (%) | Incidence rate <sup>b)</sup> | aHR (95% CI)                      |                                   |
|-----------------------------------|---------------|------------------------------|-----------------------------------|-----------------------------------|
|                                   |               |                              | Model 1 <sup>c)</sup>             | Model 2 <sup>d)</sup>             |
| Medication use for diabetes       |               |                              |                                   |                                   |
| No                                |               |                              |                                   |                                   |
| Unvaccinated                      | 3,538 (0.56)  | 0.86                         | 1.0 (reference)                   | 1.0 (reference)                   |
| Vaccinated                        | 2,759 (0.44)  | 0.74                         | 0.83 (0.79 to 0.88) <sup>e)</sup> | 0.83 (0.79 to 0.87) <sup>e)</sup> |
| Yes                               |               |                              |                                   |                                   |
| Unvaccinated                      | 713 (0.74)    | 0.17                         | 1.0 (reference)                   | 1.0 (reference)                   |
| Vaccinated                        | 670 (0.65)    | 0.18                         | 0.90 (0.81 to 1.00)               | 0.89 (0.80 to 0.99)               |
| Medication use for hyperlipidemia |               |                              |                                   |                                   |
| No                                |               |                              |                                   |                                   |
| Unvaccinated                      | 3,656 (0.58)  | 0.89                         | 1.0 (reference)                   | 1.0 (reference)                   |
| Vaccinated                        | 2,911 (0.47)  | 0.79                         | 0.85 (0.81 to 0.89) <sup>e)</sup> | 0.84 (0.80 to 0.88) <sup>e)</sup> |
| Yes                               |               |                              |                                   |                                   |
| Unvaccinated                      | 595 (0.56)    | 0.14                         | 1.0 (reference)                   | 1.0 (reference)                   |
| Vaccinated                        | 518 (0.46)    | 0.14                         | 0.83 (0.74 to 0.93) <sup>e)</sup> | 0.82 (0.73 to 0.92) <sup>e)</sup> |

aHR, adjusted hazard ratio; CI, confidence interval.

<sup>a)</sup>Non-smoker indicates individuals who do not currently smoke.

<sup>b)</sup>Incidence rate expressed as per 1,000 person-years.

<sup>c)</sup>Models 1: adjusted for age (50–54, 55–59, 60–64, and ≥ 65 years) and sex.

<sup>d)</sup>Model 2: adjusted for age (50–54, 55–59, 60–64, and ≥ 65 years); sex; household income (low income, middle income, and high income); region of residence (urban and rural); Charlson comorbidity index (0, 1, and ≥ 2); obesity (underweight [ $< 18.5 \text{ kg/m}^2$ ], normal [ $18.5\text{--}22.9 \text{ kg/m}^2$ ], overweight [ $23.0\text{--}24.9 \text{ kg/m}^2$ ], and obese [ $\geq 25.0 \text{ kg/m}^2$ ]); blood pressure (systolic blood pressure  $< 140 \text{ mmHg}$  and diastolic blood pressure  $< 90 \text{ mmHg}$  and systolic blood pressure  $\geq 140 \text{ mmHg}$  or diastolic blood pressure  $\geq 90 \text{ mmHg}$ ); fasting blood glucose ( $< 100$  and  $\geq 100 \text{ mg/dL}$ ); glomerular filtration rate ( $< 60$ ,  $60\text{--}89$ , and  $\geq 90 \text{ mL/min/1.73 m}^2$ ); smoking status (non-, ex-, and current smoker); alcohol consumption (drinks;  $< 1$ ,  $1\text{--}2$ ,  $3\text{--}4$ , and  $\geq 5$  days per week); aerobic physical activity (sufficient and insufficient); and history of medication use for coronary artery disease, diabetes mellitus, dyslipidemia, and hypertension.

<sup>e)</sup>Significant differences ( $p < 0.05$ ).
